# Supplementary material for: Genome-Wide Analysis of japonica Rice Performance under Limited Water and Permanent Flooding Conditions
Source: PubMed Central journal article supplement (PMC5670151; doi:10.3389/fpls.2017.01862), 2017-10-30

# PHENOLOGY TRAITS

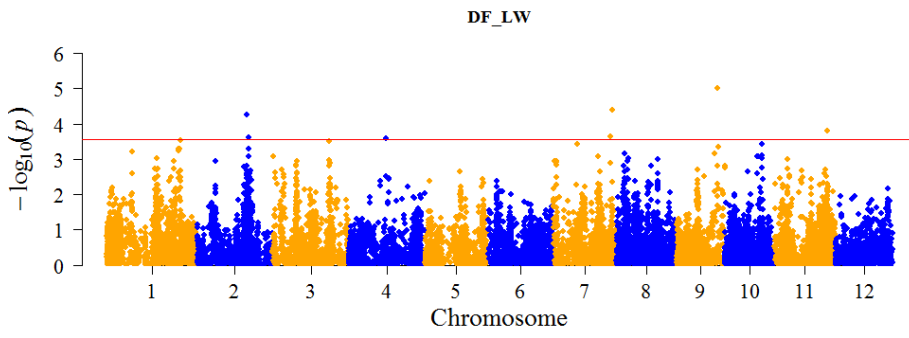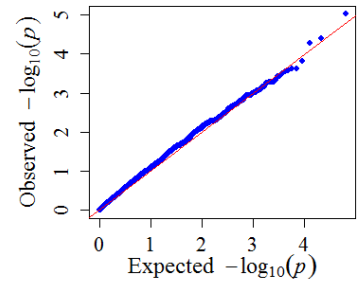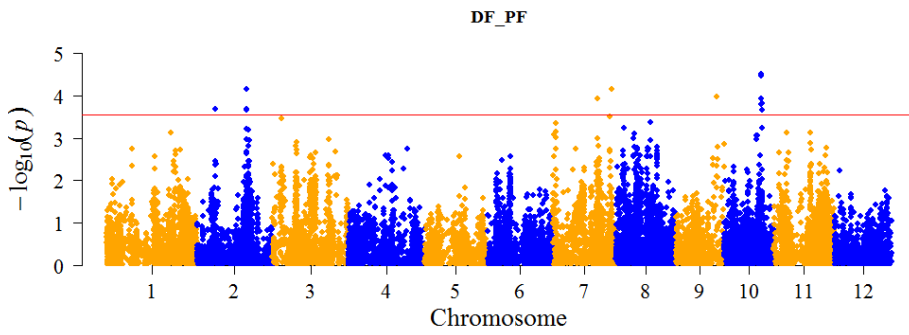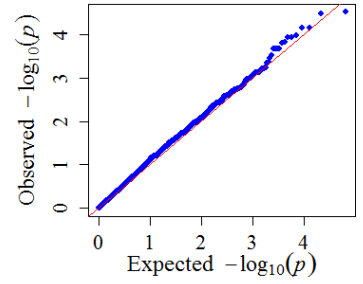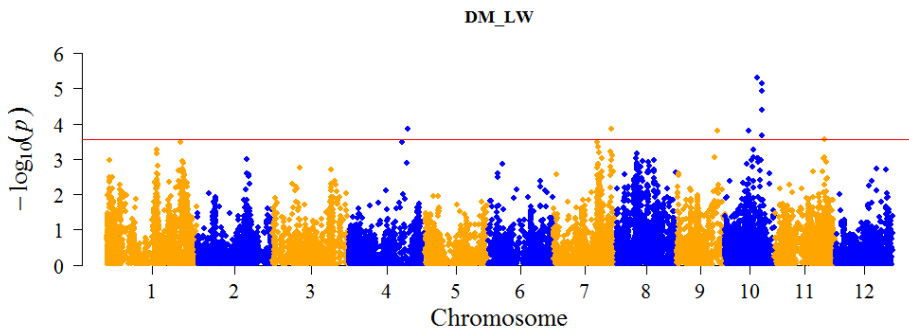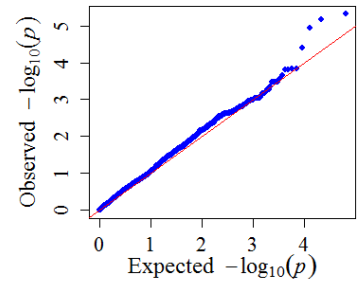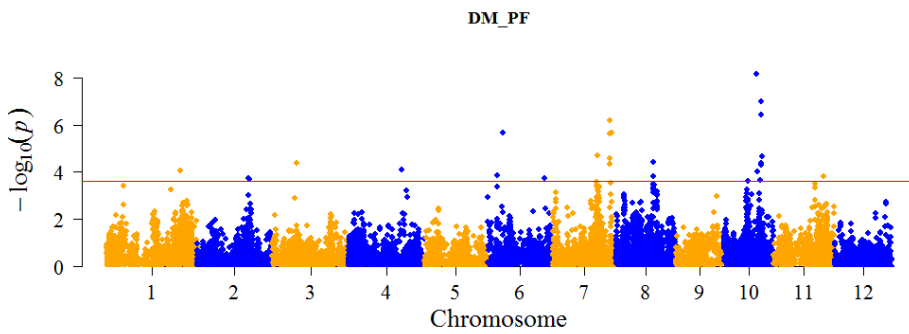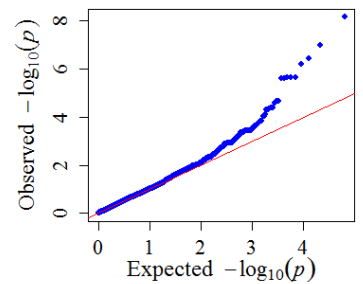

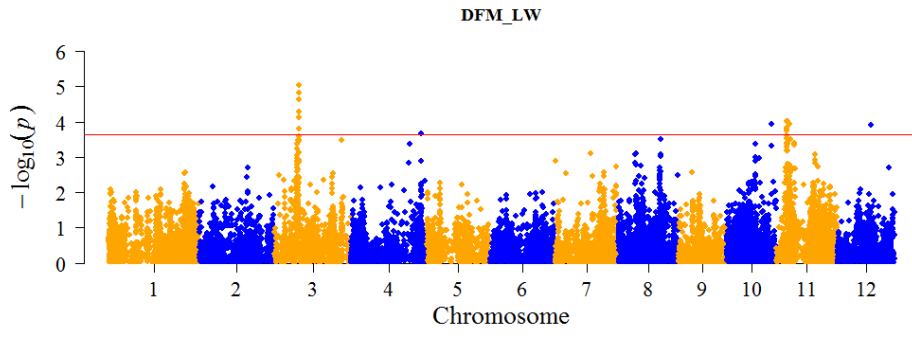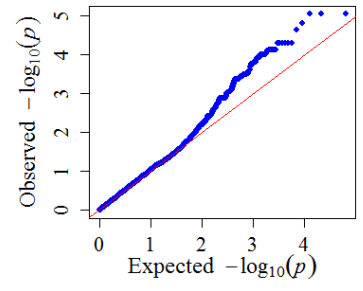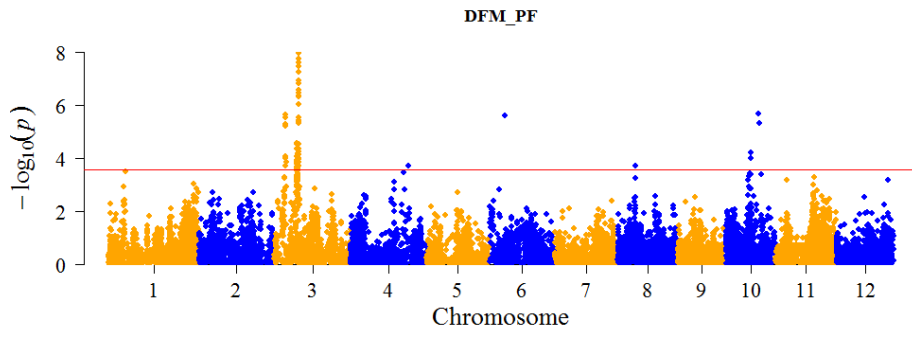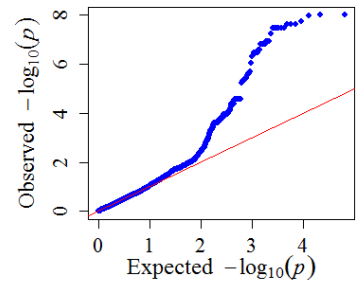

# PLANT MORPHOLOGY TRAITS

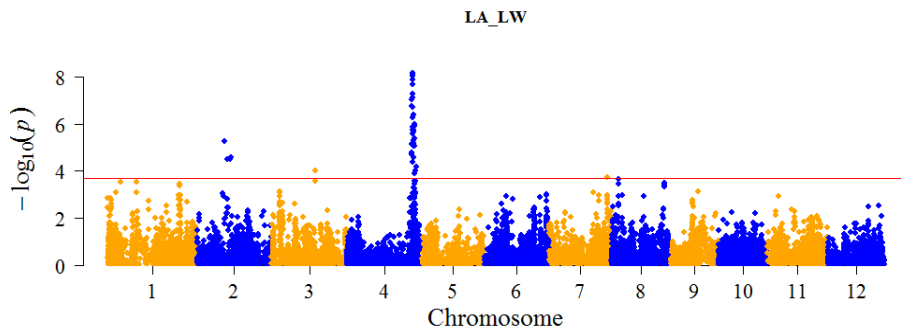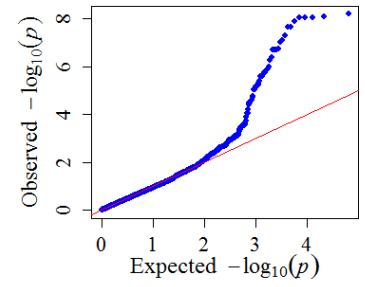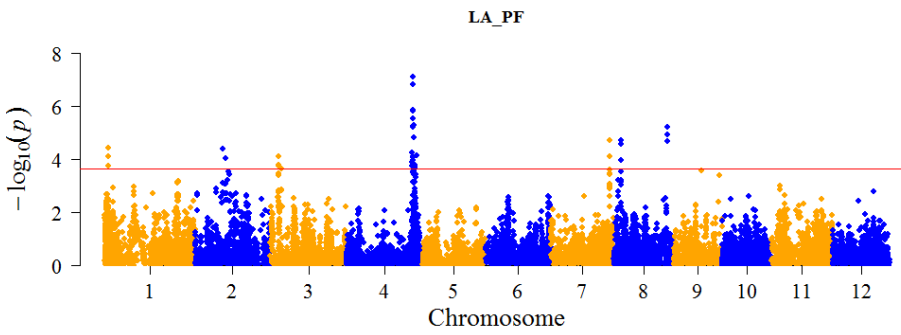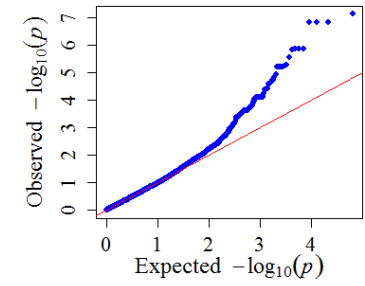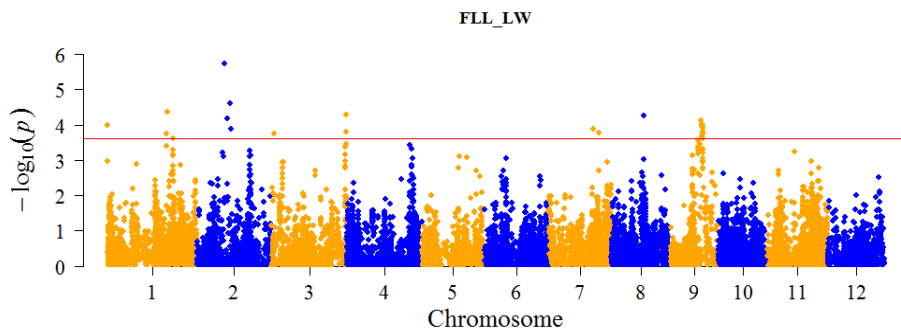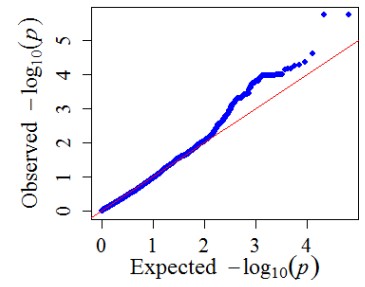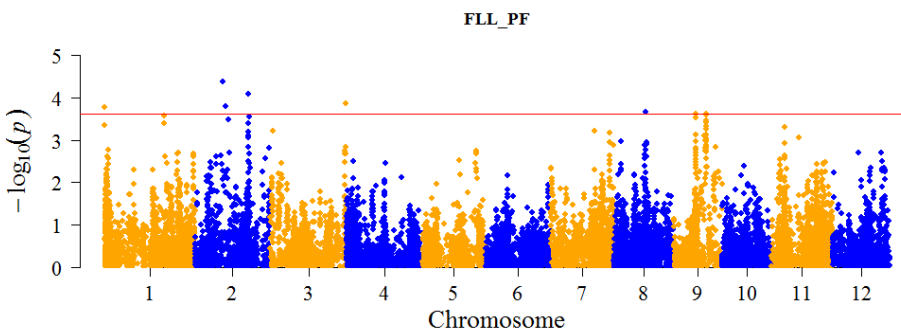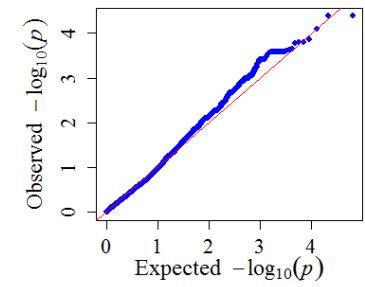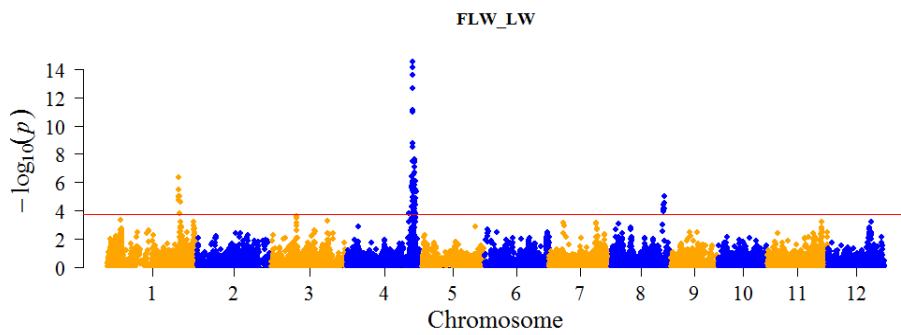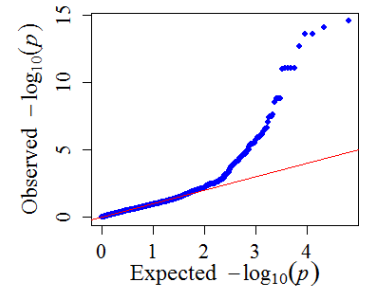

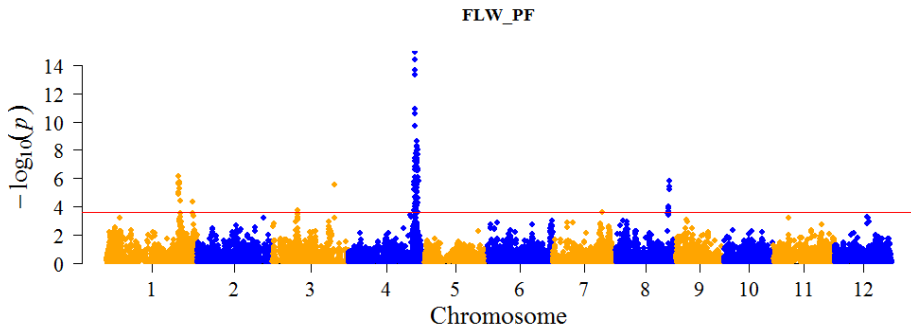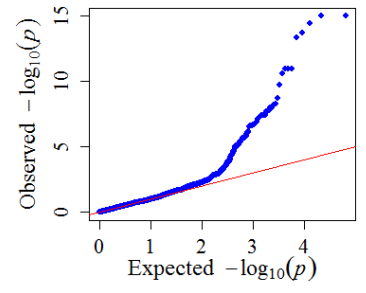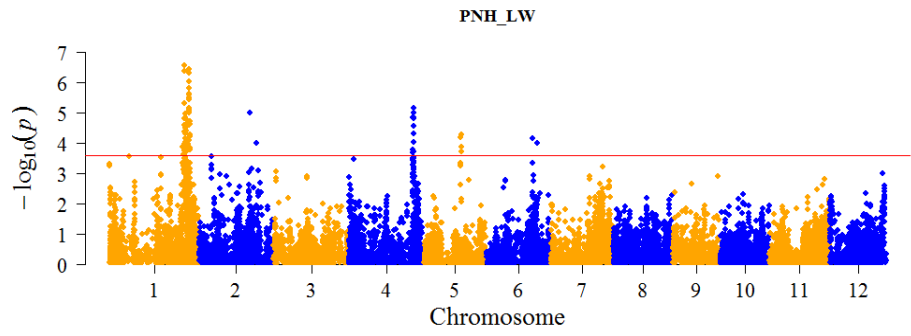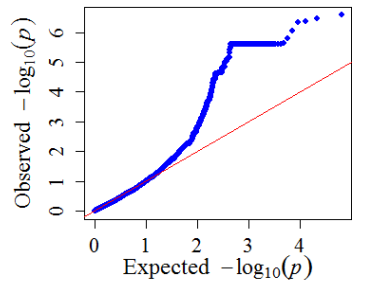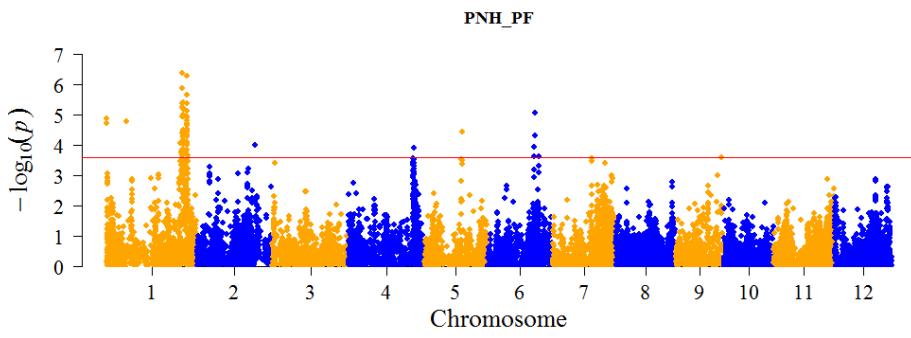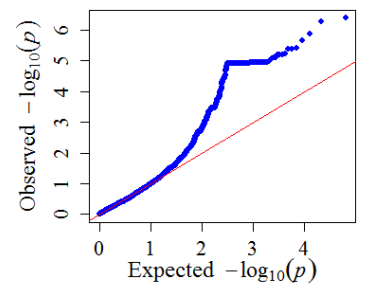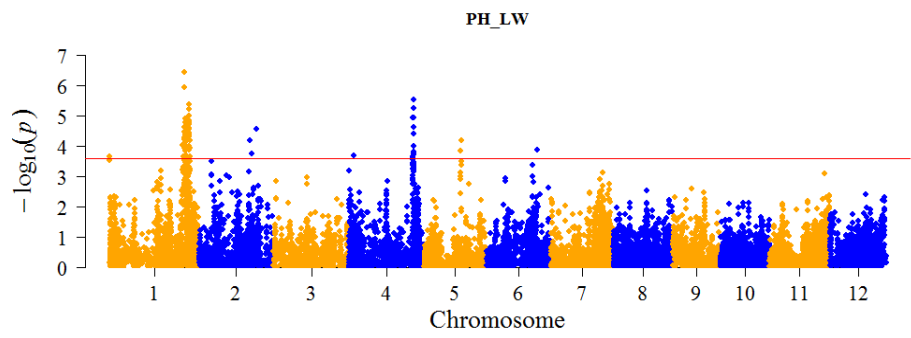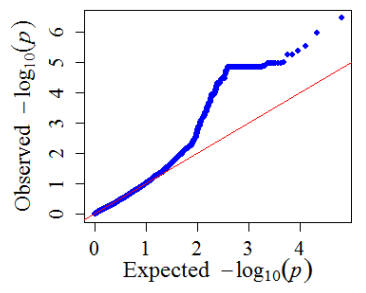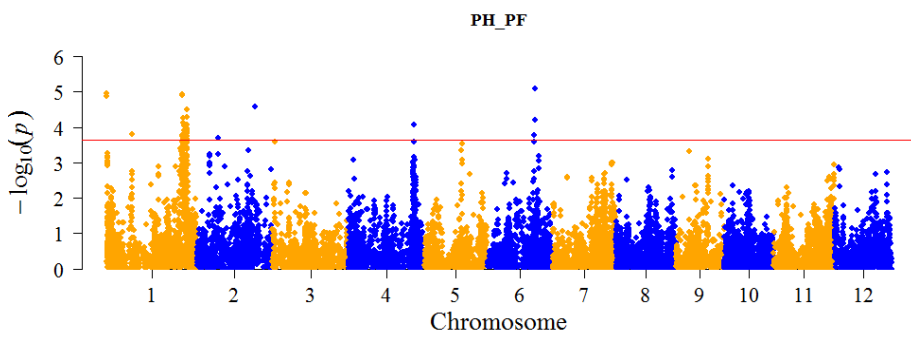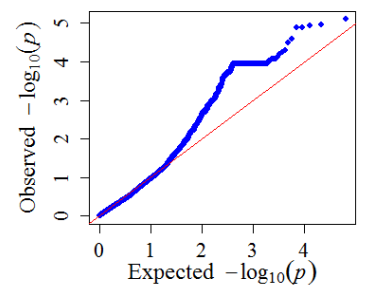

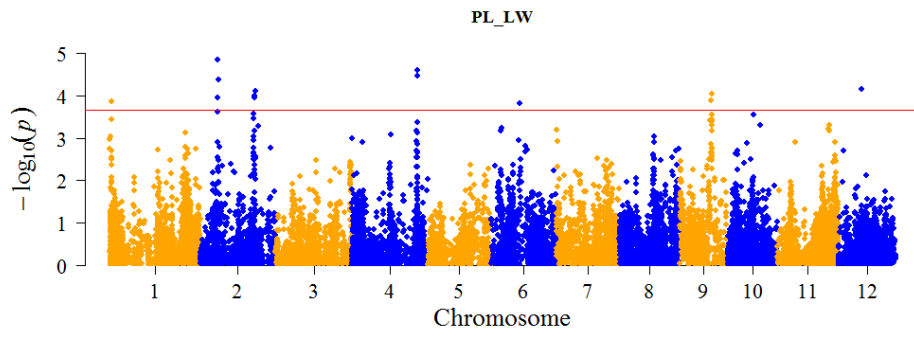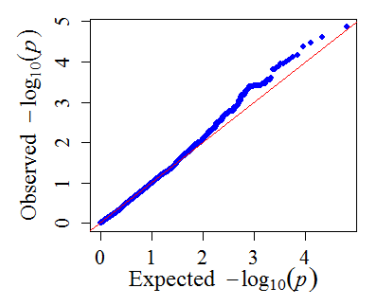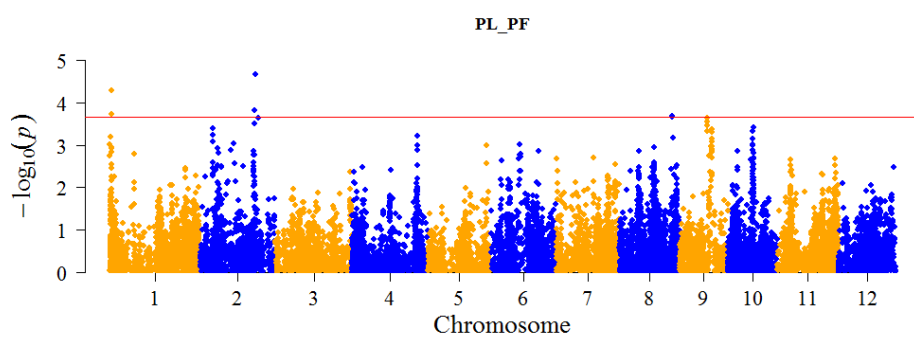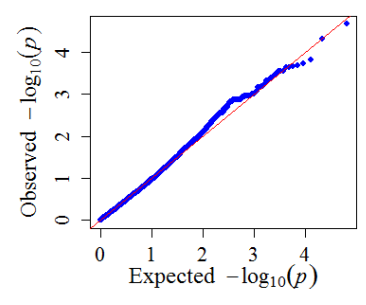

# SEED MORPHOLOGY TRAITS

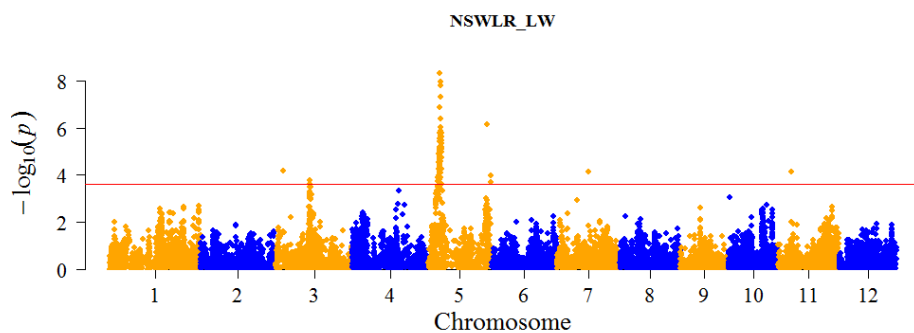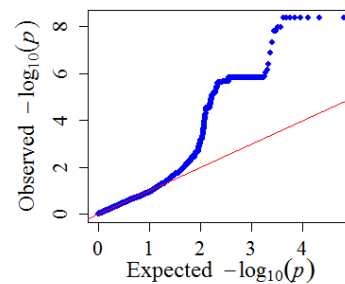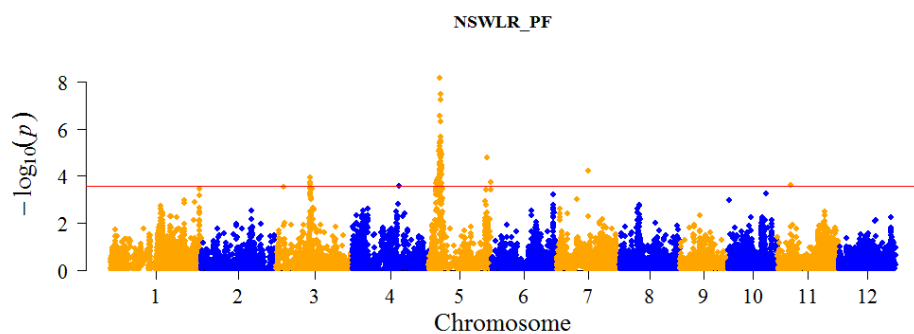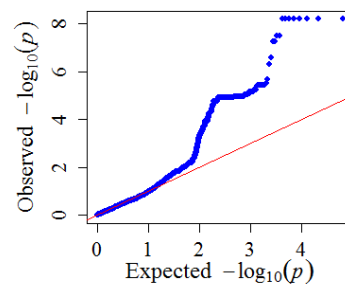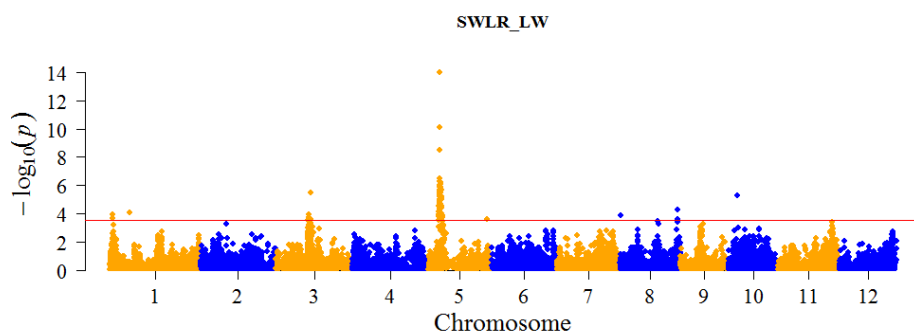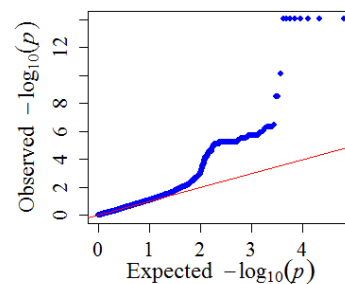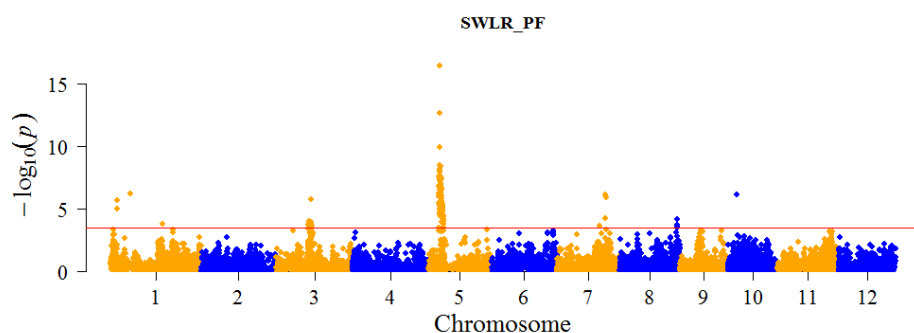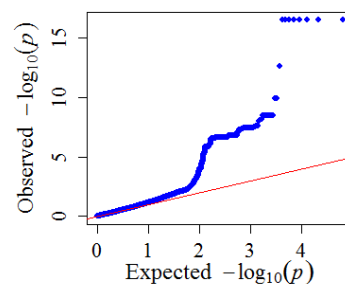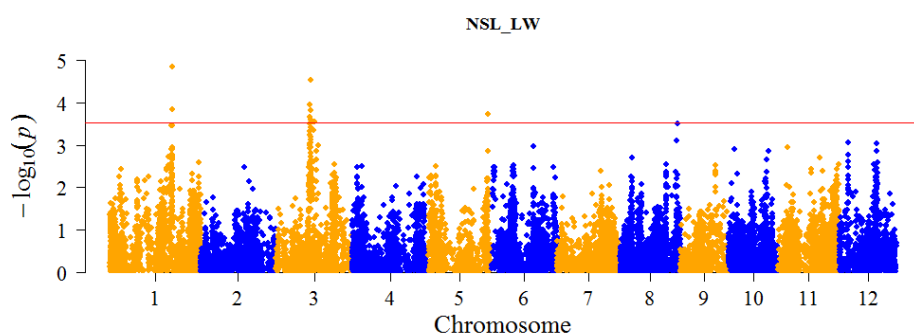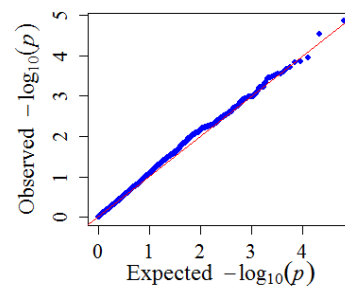

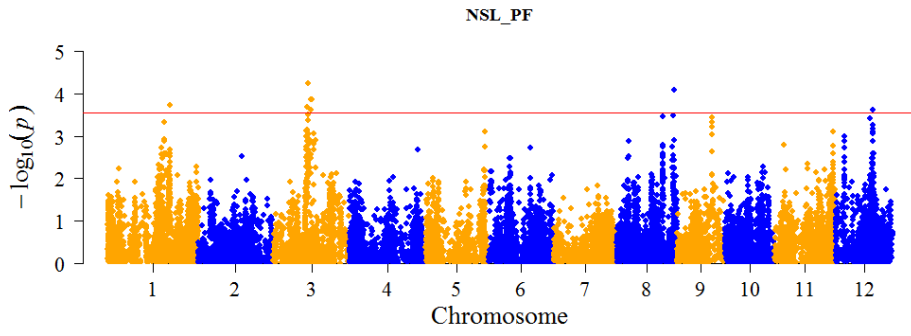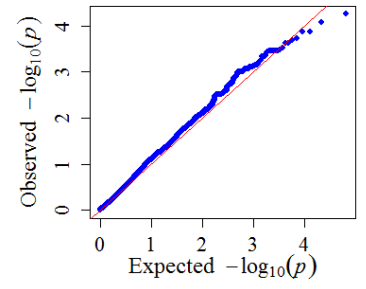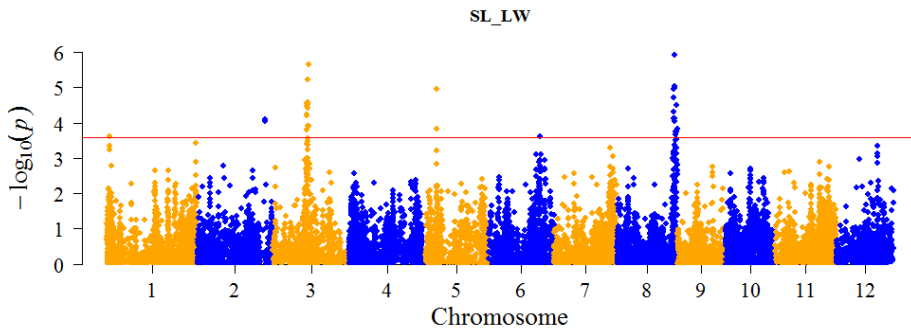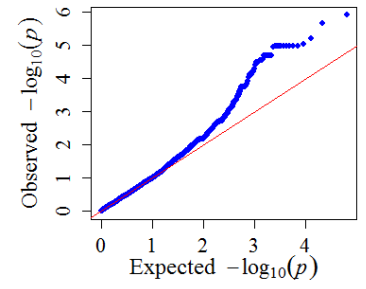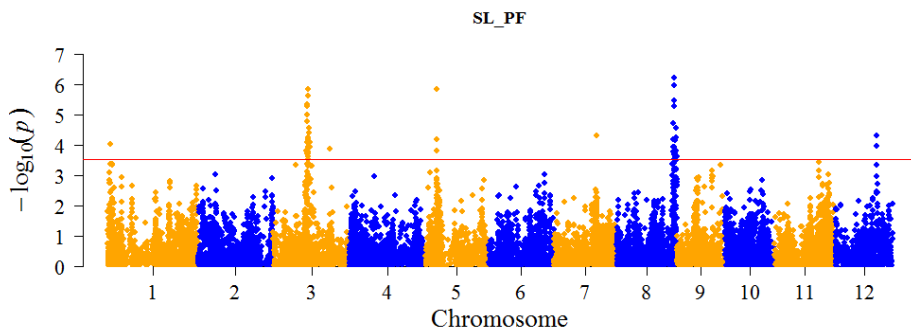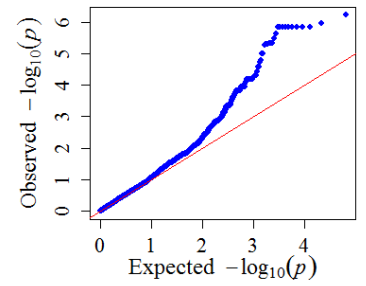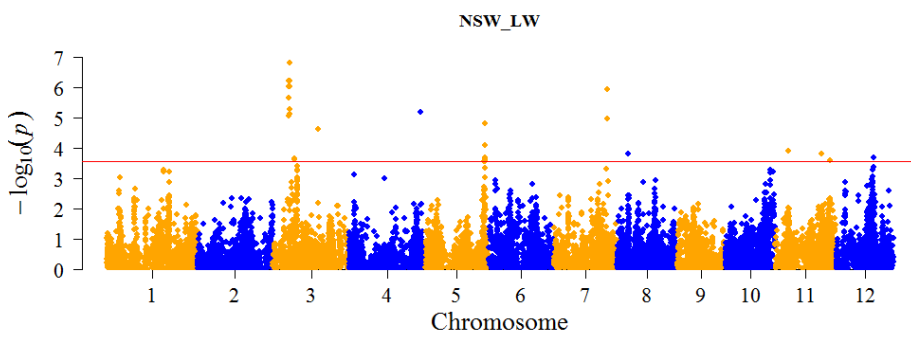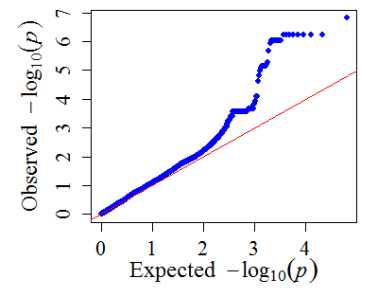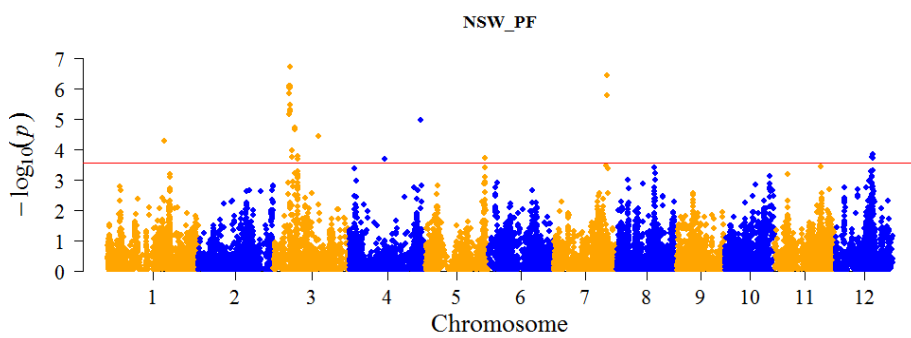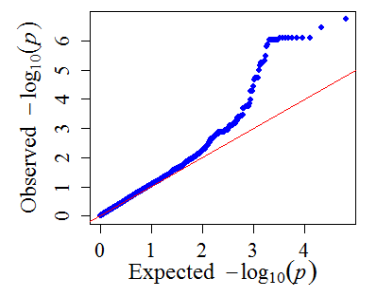

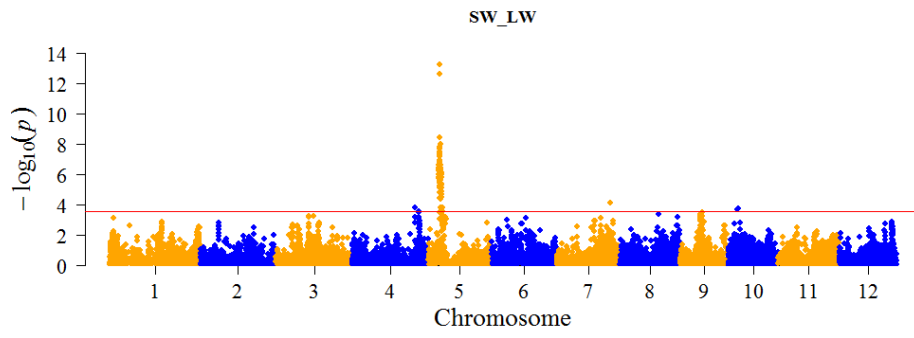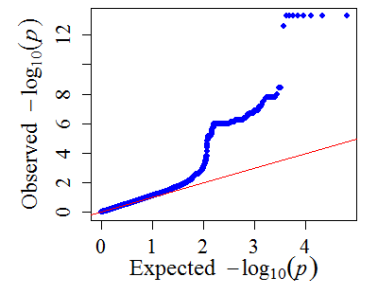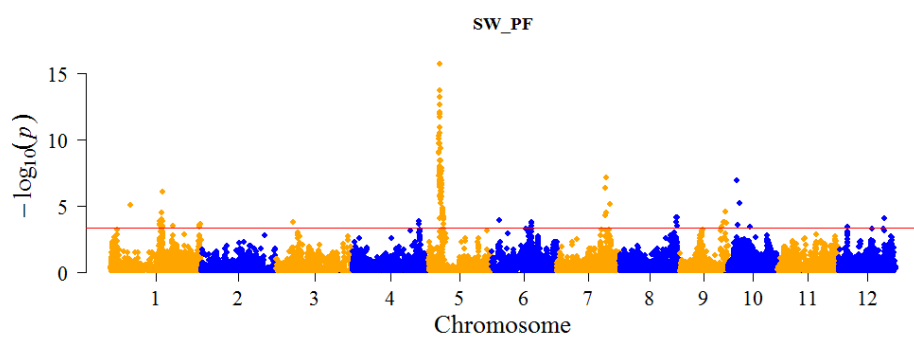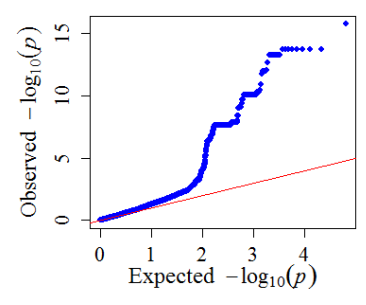



# YIELD TRAITS

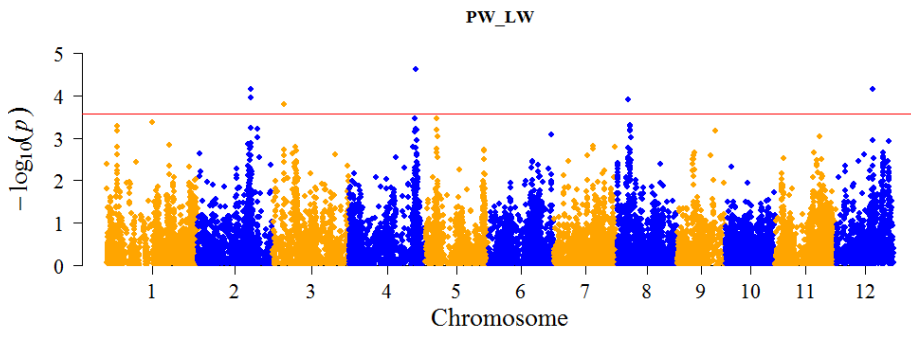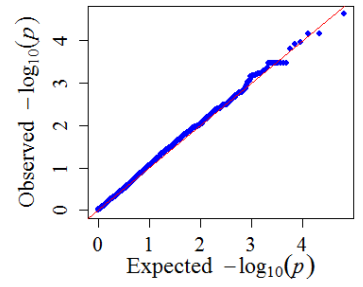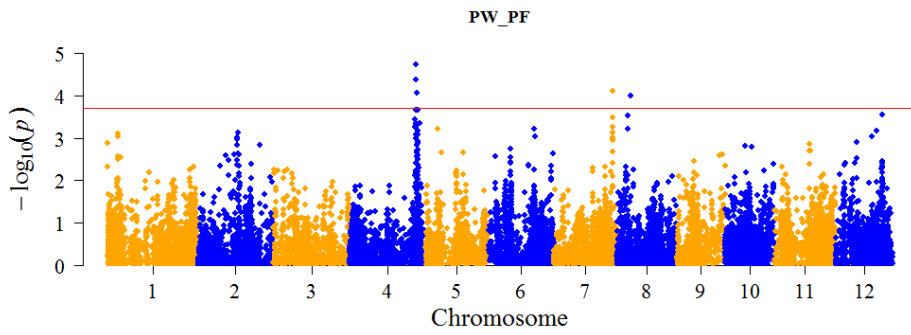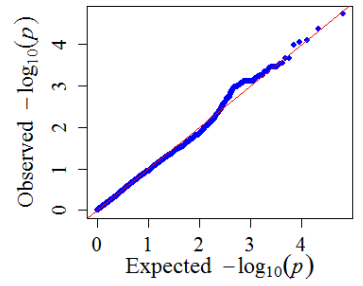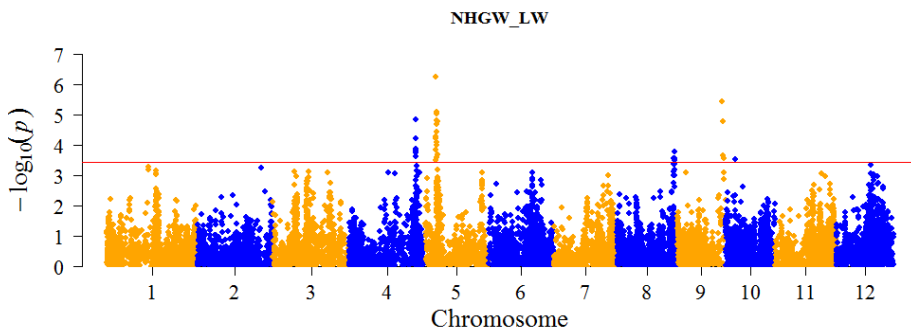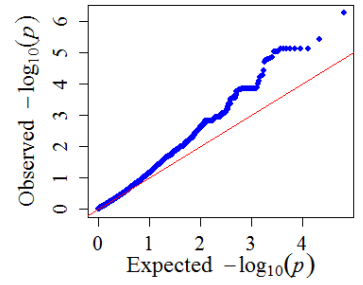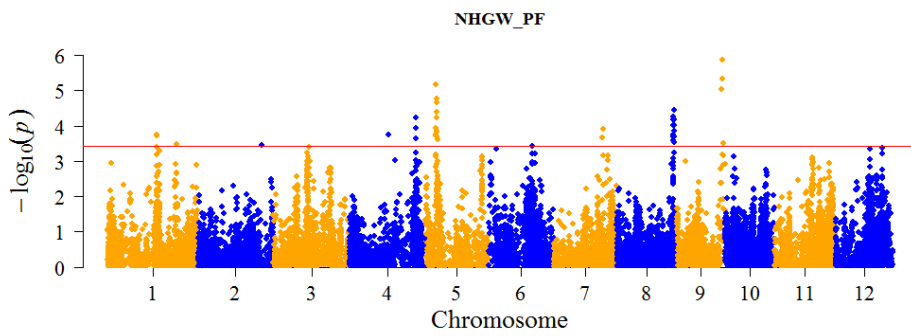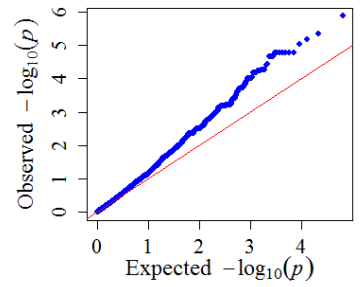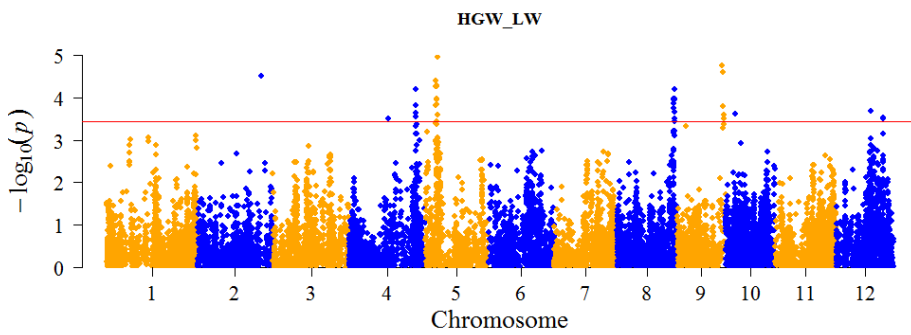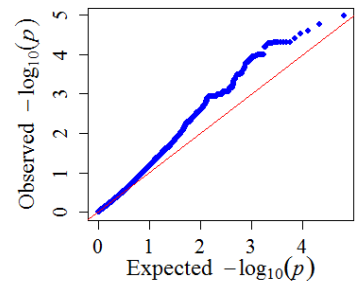

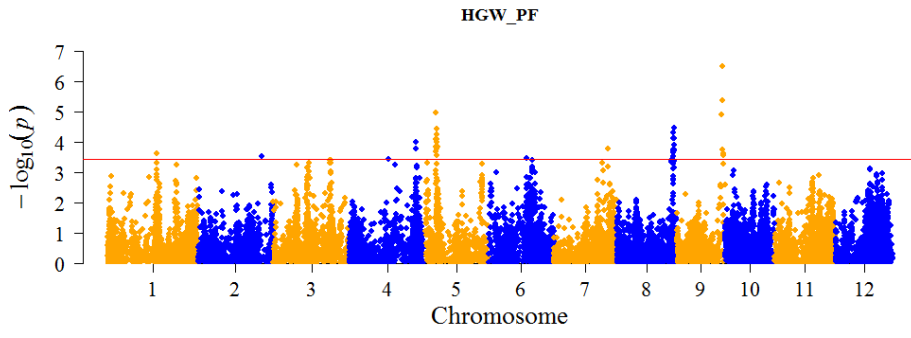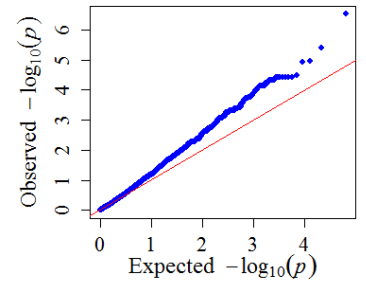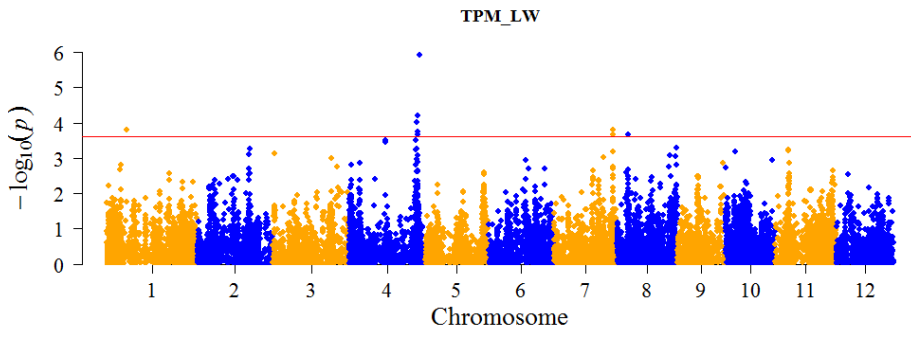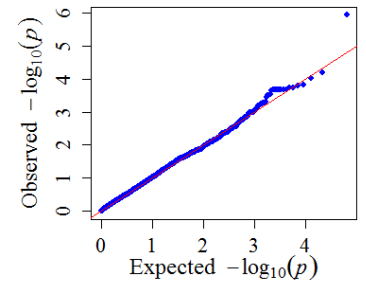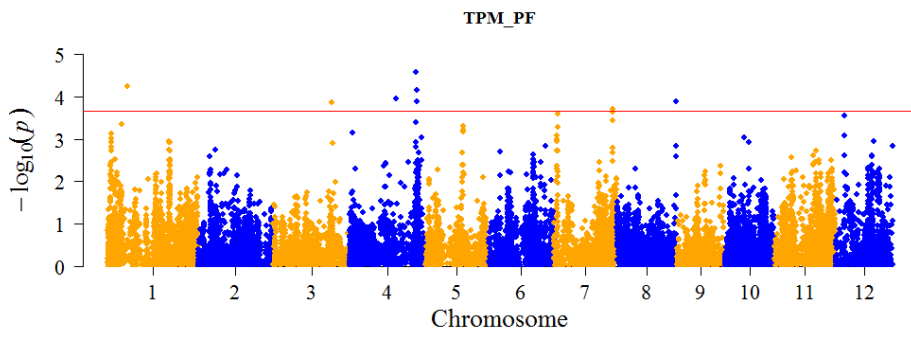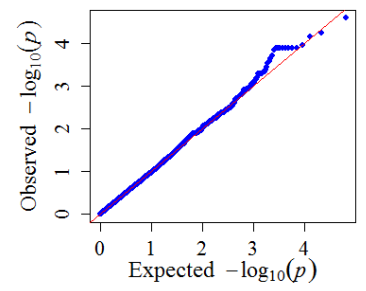

# PHYSIOLOGY TRAITS

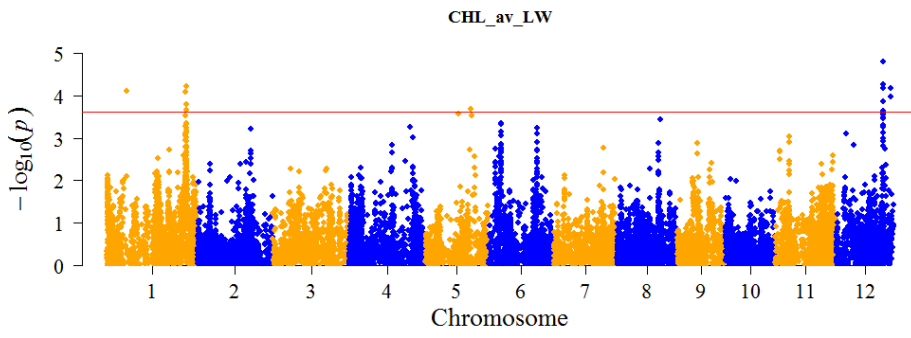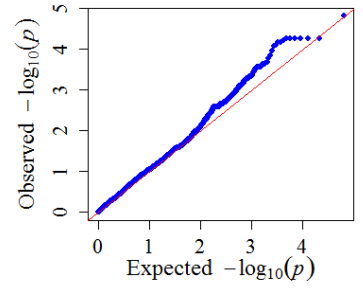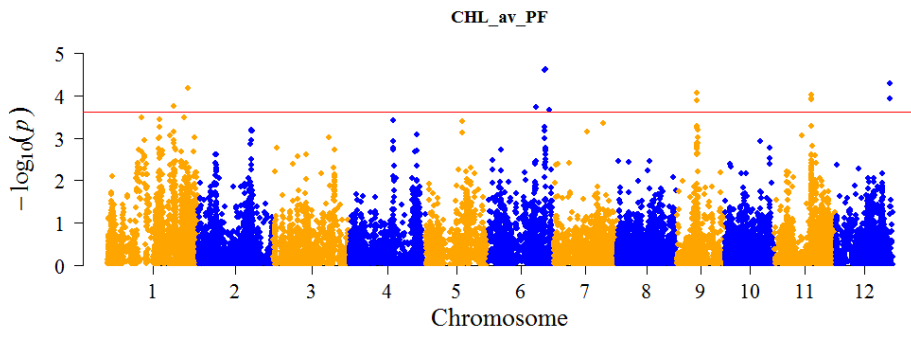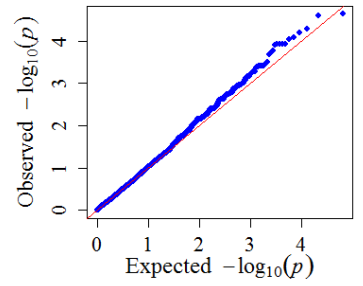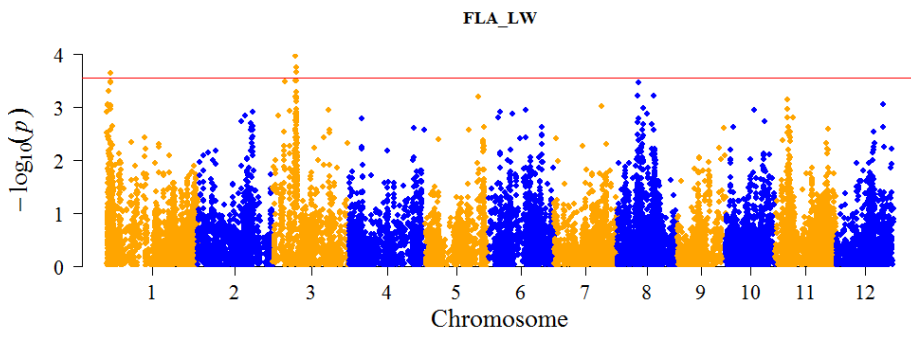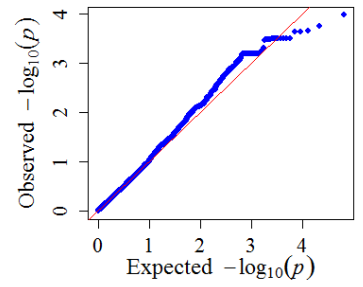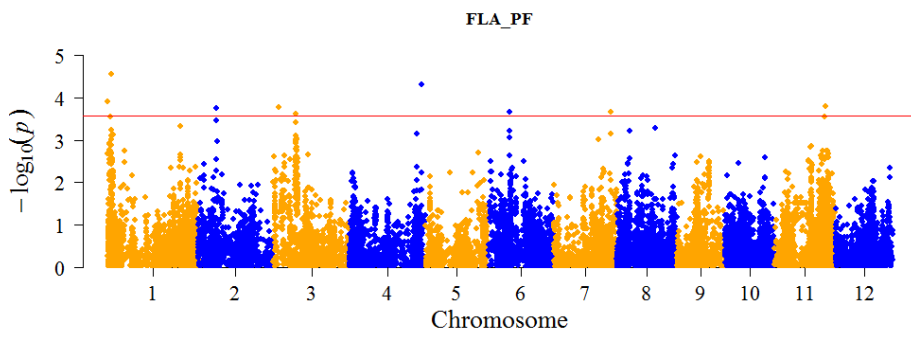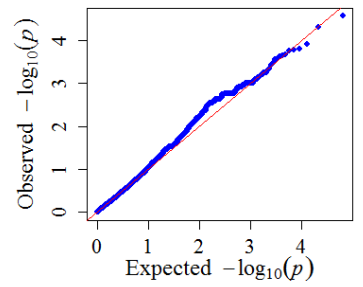

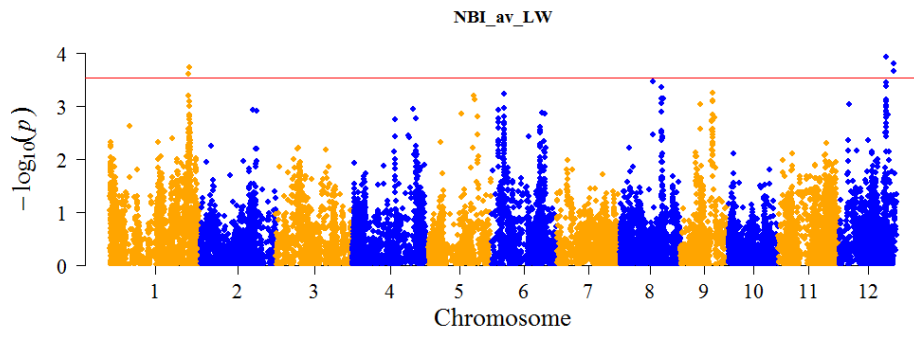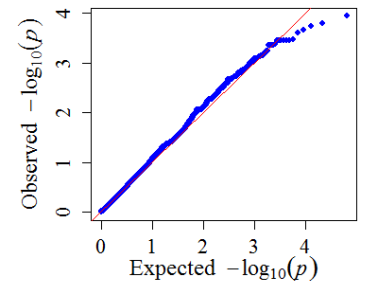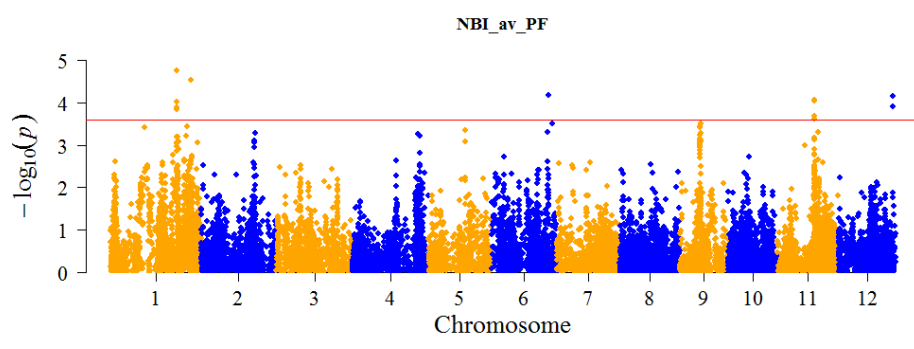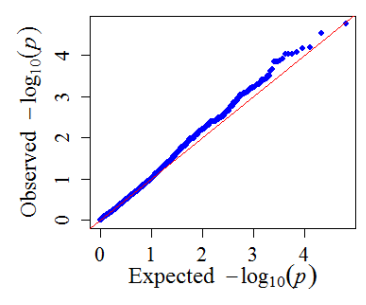

Supplement: Image_3.pdf [file Image_3.pdf]
