# Supplementary material for: Genome-Wide Analysis of japonica Rice Performance under Limited Water and Permanent Flooding Conditions
Source: Front Plant Sci. 2017 Oct 30;8:1862. doi: 10.3389/fpls.2017.01862 (PMC5670151; doi:10.3389/fpls.2017.01862)
Supplement: Supplementary file 6 [file Table_2.xlsx]

## Sheet: 1-ANOVA_LW
Table S2. Statistical analyses of the phenotypic traits: ANOVA in LW and PF (sheets 1 and 2, respectively) and correlations among traits in LW and PF (sheets 3 and 4, respectively). LW-specific correlations (sheet 3) were highlighted in red.
Anova performed with traits recorded in LW
DF
	Df	Sum Sq	Mean Sq	F	Pr(>F)
var	280	112395	401	39.91	<2e-16	***
year	1	74789	74789	7435.91	<2e-16	***
var:year	280	14884	53	5.285	<2e-16	***
Residuals	1116	11224	10
DM
	Df	Sum Sq	Mean Sq	F	Pr(>F)
var	280	113875	407	10.461	<2e-16	***
year	1	89421	89421	2300.17	<2e-16	***
var:year	276	42832	155	3.992	<2e-16	***
Residuals	1059	41169	39
DFM
	Df	Sum Sq	Mean Sq	F	Pr(>F)
var	280	50644	180.9	5.353	<2e-16	***
year	1	1735	1735.4	51.364	1.44e-12	***
var:year	276	29015	105.1	3.111	<2e-16	***
Residuals	1057	35713	33.8
FLL
	Df	Sum Sq	Mean Sq	F	Pr(>F)
var	280	2043430	7298	10.826	<2e-16	***
year	1	1375	1375	2.04	0.153
var:year	280	320422	1144	1.698	2.13e-09	***
Residuals	1078	726710	674
FLW
	Df	Sum Sq	Mean Sq	F	Pr(>F)
var	280	4311	15	13.029	<2e-16	***
year	1	6237	6237	5278.13	<2e-16	***
var:year	280	535	2	1.616	5.69e-08	***
Residuals	1078	1274	1
LA
	Df	Sum Sq	Mean Sq	F	Pr(>F)
var	280	311628977	1112961	9.059	<2e-16	2e-16
year	1	170945055	170945055	1391.39	<2e-16	2e-16
var:year	280	59729540	213320	1.736	4.11e-10	***
Residuals	1085	133301949	122859
PH
	Df	Sum Sq	Mean Sq	F	Pr(>F)
var	280	237357	847.7	21.403	<2e-16	***
year	1	1190	1189.5	30.034	5.33e-08	***
var:year	278	15756	56.7	1.431	4.9e-05	***
Residuals	1039	41151	39.6
PNH
	Df	Sum Sq	Mean Sq	F	Pr(>F)
var	280	186401	665.7	20.559	<2e-16	***
year	1	17	17.4	0.537	0.464
var:year	278	13267	47.7	1.474	1.19e-05	***
Residuals	1039	33643	32.4
PL
	Df	Sum Sq	Mean Sq	F	Pr(>F)
var	280	10330	36.9	9.41	<2e-16	***
year	1	919	919.3	234.46	<2e-16	***
var:year	278	1777	6.4	1.63	4.02e-08	***
Residuals	1039	4074	3.9
TPM
	Df	Sum Sq	Mean Sq	F	Pr(>F)
var	280	316403	1130	4.343	<2e-16	***
year	1	644049	644049	2475.51	<2e-16	***
var:year	277	160511	579	2.227	<2e-16	***
Residuals	985	256266	260
SL
	Df	Sum Sq	Mean Sq	F	Pr(>F)
var	280	1132.8	4.046	14.513	<2e-16	***
year	1	23.8	23.848	85.547	<2e-16	***
var:year	276	81.1	0.294	1.054	0.286
Residuals	1007	280.7	0.279
SW
	Df	Sum Sq	Mean Sq	F	Pr(>F)
var	280	268.69	0.96	11.908	<2e-16	***
year	1	5.91	5.909	73.328	<2e-16	***
var:year	276	26.41	0.096	1.187	0.0333	*
Residuals	1004	80.91	0.081
SWLR
	Df	Sum Sq	Mean Sq	F	Pr(>F)
var	280	8.448	0.030171	21.094	<2e-16	***
year	1	0.008	0.007994	5.589	0.0183	*
var:year	276	0.61	0.00221	1.545	1.23e-06	***
Residuals	987	1.412	0.00143
NSL
	Df	Sum Sq	Mean Sq	F	Pr(>F)
var	280	717.5	2.5626	14.259	<2e-16	2e-16
year	1	0	0	0	0.99381
var:year	277	65.8	0.2377	1.322	0.00131	**
Residuals	1019	183.1	0.1797
NSW
	Df	Sum Sq	Mean Sq	F	Pr(>F)
var	280	180.17	0.6435	17.652	<2e-16	***
year	1	1	1.0014	27.472	1.94e-07	***
var:year	277	11.19	0.0404	1.109	0.135
Residuals	1020	37.18	0.0365
NSWLR
	Df	Sum Sq	Mean Sq	F	Pr(>F)
var	280	12.887	0.04602	29.618	<2e-16	***
year	1	0.006	0.00622	4.006	0.0456	*
var:year	277	0.774	0.00279	1.798	5.75e-11	***
Residuals	1002	1.557	0.00155
HGW
	Df	Sum Sq	Mean Sq	F	Pr(>F)
var	280	364	1.3	33.586	<2e-16	***
year	1	33.2	33.15	856.573	<2e-16	***
var:year	276	23	0.08	2.155	<2e-16	***
Residuals	1005	38.9	0.04
NHGW
	Df	Sum Sq	Mean Sq	F	Pr(>F)
var	280	253.81	0.9065	48.922	<2e-16	***
year	1	2.74	2.7381	147.778	<2e-16	***
var:year	277	14.57	0.0526	2.839	<2e-16	***
Residuals	1016	18.83	0.0185
PW
	Df	Sum Sq	Mean Sq	F	Pr(>F)
var	280	1673405	5976	10.8	<2e-16	***
year	1	248422	248422	448.94	<2e-16	***
var:year	276	404559	1466	2.649	<2e-16	***
Residuals	939	519598	553
CHL_AB
	Df	Sum Sq	Mean Sq	F	Pr(>F)
var	280	23049	82	3.539	<2e-16	***
year	1	7209	7209	309.933	<2e-16	***
var:year	278	10241	37	1.584	2.22e-07	***
Residuals	1057	24586	23
CHL_AD
	Df	Sum Sq	Mean Sq	F	Pr(>F)
var	280	23147	83	3.402	<2e-16	***
year	1	7055	7055	290.359	<2e-16	***
var:year	278	10078	36	1.492	5.96e-06	***
Residuals	1069	25974	24
CHL_AV
	Df	Sum Sq	Mean Sq	F	Pr(>F)
var	280	22863	82	3.391	<2e-16	***
year	1	7279	7279	302.24	<2e-16	***
var:year	278	9863	35	1.473	1.13e-05	***
Residuals	1071	25793	24
FLA
	Df	Sum Sq	Mean Sq	F	Pr(>F)
var	280	36.53	0.13	4.117	<2e-16	***
year	1	8.72	8.723	275.299	<2e-16	***
var:year	278	12.85	0.046	1.459	1.81e-05	***
Residuals	1072	33.97	0.032
NBI_AB
	Df	Sum Sq	Mean Sq	F	Pr(>F)
var	280	3216	11.5	3.662	<2e-16	***
year	1	397	397.3	126.689	<2e-16	***
var:year	278	1406	5.1	1.612	7.4e-08	***
Residuals	1060	3324	3.1
NBI_AD
	Df	Sum Sq	Mean Sq	F	Pr(>F)
var	280	3264	11.7	3.799	<2e-16	***
year	1	359	358.6	116.877	<2e-16	***
var:year	278	1366	4.9	1.602	1.08e-07	***
Residuals	1070	3283	3.1
NBI_AV
	Df	Sum Sq	Mean Sq	F	Pr(>F)
var	280	3206	11.5	3.78	<2e-16	***
year	1	367	366.6	120.998	<2e-16	***
var:year	278	1313	4.7	1.558	5.48e-07	***
Residuals	1071	3245	3
Signif. codes: 0 ‘***’ 0.001 ‘**’ 0.01 ‘*’ 0.05 ‘.’ 0.1 ‘ ’ 1

## Sheet: 2-ANOVA_PF
Anova performed with traits recorded in PF
DF
	Df	Sum Sq	Mean Sq	F	Pr(>F)
var	280	80854	289	47.834	<2e-16	***
year	1	13942	13942	2309.44	<2e-16	***
var:year	280	6086	22	3.601	<2e-16	***
Residuals	1121	6767	6
DM
	Df	Sum Sq	Mean Sq	F	Pr(>F)
var	280	103201	369	14.677	<2e-16	***
year	1	39610	39610	1577.35	<2e-16	***
var:year	280	23809	85	3.386	<2e-16	***
Residuals	1112	27924	25
DFM
	Df	Sum Sq	Mean Sq	F	Pr(>F)
var	280	55749	199	8.243	<2e-16	***
year	1	6843	6843	283.275	<2e-16	***
var:year	280	25788	92	3.813	<2e-16	***
Residuals	1110	26813	24
FLL
	Df	Sum Sq	Mean Sq	F	Pr(>F)
var	280	3913321	13976	17.438	<2e-16	***
year	1	417822	417822	521.322	<2e-16	***
var:year	280	540180	1929	2.407	<2e-16	***
Residuals	1102	883216	801
FLW
	Df	Sum Sq	Mean Sq	F	Pr(>F)
var	280	6301	22.5	17.374	<2e-16	***
year	1	2816	2815.9	2173.91	<2e-16	***
var:year	280	783	2.8	2.159	<2e-16	***
Residuals	1101	1426	1.3
LA
	Df	Sum Sq	Mean Sq	F	Pr(>F)
var	280	612978974	2189211	13.549	<2e-16	***
year	1	274798203	274798203	1700.68	<2e-16	***
var:year	280	88604923	316446	1.958	1.93e-14	***
Residuals	1099	177578292	161582
PH
	Df	Sum Sq	Mean Sq	F	Pr(>F)
var	280	273430	977	47.589	<2e-16	***
year	1	6631	6631	323.146	<2e-16	***
var:year	280	7602	27	1.323	0.0011	**
Residuals	1115	22880	21
PNH
	Df	Sum Sq	Mean Sq	F	Pr(>F)
var	280	212677	760	42.033	<2e-16	***
year	1	4479	4479	247.856	<2e-16	***
var:year	280	5932	21	1.172	0.0422	*
Residuals	1114	20131	18
PL
	Df	Sum Sq	Mean Sq	F	Pr(>F)
var	280	12284	43.87	12.167	<2e-16	***
year	1	199	198.88	55.158	2.21e-13	***
var:year	280	2097	7.49	2.077	<2e-16	***
Residuals	1114	4017	3.61
TPM
	Df	Sum Sq	Mean Sq	F	Pr(>F)
var	280	443383	1584	5.412	<2e-16	***
year	1	3354	3354	11.462	0.000739	***
var:year	278	172241	620	2.117	<2e-16	***
Residuals	968	283245	293
SL
	Df	Sum Sq	Mean Sq	F	Pr(>F)
var	280	1629.3	5.819	178.925	<2e-16	***
year	1	0	0.03	0.914	0.339
var:year	280	27.1	0.097	2.976	<2e-16	***
Residuals	1071	34.8	0.033
SW
	Df	Sum Sq	Mean Sq	F	Pr(>F)
var	280	400.6	1.4307	197.378	<2e-16	***
year	1	0.1	0.0896	12.363	0.000456	***
var:year	280	3.2	0.0113	1.553	6.16e-07	***
Residuals	1071	7.8	0.0072
SWLR
	Df	Sum Sq	Mean Sq	F	Pr(>F)
var	280	11.068	0.03953	360.244	<2e-16	***
year	1	0.001	0.00106	9.617	0.00198	**
var:year	280	0.073	0.00026	2.381	<2e-16	***
Residuals	1071	0.118	0.00011
NSL
	Df	Sum Sq	Mean Sq	F	Pr(>F)
var	280	1075.9	3.842	66.158	<2e-16	2e-16
year	1	1.7	1.749	30.114	5.08e-08	***
var:year	280	27.2	0.097	1.675	5.32e-09	***
Residuals	1075	62.4	0.058
NSW
	Df	Sum Sq	Mean Sq	F	Pr(>F)
var	280	254.85	0.9102	309.507	<2e-16	***
year	1	0.05	0.0507	17.244	3.55e-05	***
var:year	280	1.47	0.0052	1.781	6.37e-11	***
Residuals	1074	3.16	0.0029
NSWLR
	Df	Sum Sq	Mean Sq	F	Pr(>F)
var	280	16.362	0.05844	536.421	<2e-16	***
year	1	0.013	0.01315	120.708	<2e-16	***
var:year	280	0.101	0.00036	3.327	<2e-16	***
Residuals	1075	0.117	0.00011
HGW
	Df	Sum Sq	Mean Sq	F	Pr(>F)
var	280	476.9	1.703	79.38	<2e-16	***
year	1	3.8	3.752	174.85	<2e-16	***
var:year	280	16.5	0.059	2.74	<2e-16	***
Residuals	1085	23.3	0.021
NHGW
	Df	Sum Sq	Mean Sq	F	Pr(>F)
var	280	347	1.2393	172.26	<2e-16	***
year	1	0.6	0.5522	76.75	<2e-16	***
var:year	280	8.9	0.0318	4.42	<2e-16	***
Residuals	1079	7.8	0.0072
PW
	Df	Sum Sq	Mean Sq	F	Pr(>F)
var	280	2299403	8212	16.076	<2e-16	***
year	1	46050	46050	90.15	<2e-16	***
var:year	279	421043	1509	2.954	<2e-16	***
Residuals	1044	533295	511
CHL_AB
	Df	Sum Sq	Mean Sq	F	Pr(>F)
var	280	27176	97.1	3.675	<2e-16	***
year	1	2762	2762.4	104.587	<2e-16	***
var:year	280	11190	40	1.513	2.44e-06	***
Residuals	1104	29159	26.4
CHL_AD
	Df	Sum Sq	Mean Sq	F	Pr(>F)
var	280	27393	97.8	3.833	<2e-16	***
year	1	2952	2952.2	115.655	<2e-16	***
var:year	280	11218	40.1	1.57	3.07e-07	***
Residuals	1102	28130	25.5
CHL_AV
	Df	Sum Sq	Mean Sq	F	Pr(>F)
var	280	27148	97	3.774	<2e-16	***
year	1	2804	2803.8	109.125	<2e-16	***
var:year	280	11117	39.7	1.545	7.57e-07	***
Residuals	1104	28365	25.7
FLA
	Df	Sum Sq	Mean Sq	F	Pr(>F)
var	280	41.54	0.15	5.882	<2e-16	***
year	1	109.98	109.98	4360.56	<2e-16	***
var:year	280	20.49	0.07	2.902	<2e-16	***
Residuals	1105	27.87	0.03
NBI_AB
	Df	Sum Sq	Mean Sq	F	Pr(>F)
var	280	4383	15.7	3.906	<2e-16	***
year	1	604	604.3	150.786	<2e-16	***
var:year	280	2034	7.3	1.812	1.41e-11	***
Residuals	1104	4425	4
NBI_AD
	Df	Sum Sq	Mean Sq	F	Pr(>F)
var	280	4494	16.1	3.838	<2e-16	***
year	1	547	547	130.816	<2e-16	***
var:year	280	2045	7.3	1.746	2.44e-10	***
Residuals	1104	4616	4.2
NBI_AV
	Df	Sum Sq	Mean Sq	F	Pr(>F)
var	280	4404	15.7	3.961	<2e-16	***
year	1	599	598.9	150.828	<2e-16	***
var:year	280	2010	7.2	1.808	1.69e-11	***
Residuals	1104	4384	4
Signif. codes: 0 ‘***’ 0.001 ‘**’ 0.01 ‘*’ 0.05 ‘.’ 0.1 ‘ ’ 1

## Sheet: 3 - LW_PEARSON CORRELATION
Correlations among traits recorded in LW. LW-specific correlations are highlighted in red.
Correlation value	DF	DM	DFM	FLL	FLW	LA	PH	PNH	PL	TPM	SL	SW	SWLR	NSL	NSW	NSWLR	HGW	NHGW	PW	CHL_AB	CHL_AD	CHL_AV	FLA	NBI_AB	NBI_AD	NBI_AV
DF	1	0.89	0.17	0.01	0.81	0.63	-0.59	-0.6	-0.4	0.84	0.18	-0.66	-0.48	0.32	-0.64	-0.49	-0.76	-0.71	-0.8	0.25	0.25	0.25	0.58	0.1	0.1	0.1
DM	0.89	1	0.6	-0.14	0.81	0.52	-0.65	-0.61	-0.6	0.78	-0.1	-0.44	-0.22	0.03	-0.4	-0.22	-0.69	-0.61	-0.69	0.34	0.34	0.34	0.35	0.24	0.24	0.24
DFM	0.17	0.6	1	-0.33	0.32	0.02	-0.37	-0.28	-0.61	0.22	-0.53	0.2	0.37	-0.48	0.25	0.38	-0.16	-0.09	-0.09	0.29	0.3	0.29	-0.26	0.33	0.33	0.33
FLL	0.01	-0.14	-0.33	1	-0.06	0.64	0.56	0.49	0.64	-0.27	0.21	-0.02	-0.1	0.17	-0.03	-0.1	0.18	0.13	0.2	-0.52	-0.53	-0.52	0.35	-0.55	-0.56	-0.56
FLW	0.81	0.81	0.32	-0.06	1	0.73	-0.58	-0.53	-0.58	0.76	-0.15	-0.34	-0.14	-0.01	-0.31	-0.15	-0.6	-0.5	-0.53	0.42	0.42	0.42	0.31	0.32	0.32	0.32
LA	0.63	0.52	0.02	0.64	0.73	1	-0.06	-0.07	-0.01	0.39	0.02	-0.26	-0.16	0.1	-0.25	-0.17	-0.33	-0.29	-0.27	-0.03	-0.04	-0.04	0.48	-0.14	-0.14	-0.14
PH	-0.59	-0.65	-0.37	0.56	-0.58	-0.06	1	0.98	0.76	-0.7	0.11	0.32	0.15	-0.01	0.31	0.16	0.57	0.51	0.65	-0.5	-0.5	-0.5	-0.1	-0.43	-0.44	-0.44
PNH	-0.6	-0.61	-0.28	0.49	-0.53	-0.07	0.98	1	0.63	-0.69	0	0.42	0.26	-0.12	0.41	0.27	0.61	0.57	0.7	-0.44	-0.45	-0.44	-0.17	-0.37	-0.37	-0.37
PL	-0.4	-0.6	-0.61	0.64	-0.58	-0.01	0.76	0.63	1	-0.52	0.48	-0.12	-0.29	0.38	-0.15	-0.28	0.27	0.16	0.27	-0.54	-0.54	-0.54	0.19	-0.54	-0.54	-0.54
TPM	0.84	0.78	0.22	-0.27	0.76	0.39	-0.7	-0.69	-0.52	1	0.01	-0.57	-0.36	0.15	-0.54	-0.35	-0.8	-0.72	-0.83	0.45	0.45	0.45	0.36	0.33	0.33	0.33
SL	0.18	-0.1	-0.53	0.21	-0.15	0.02	0.11	0	0.48	0.01	1	-0.72	-0.91	0.96	-0.74	-0.9	-0.07	-0.14	-0.24	-0.16	-0.16	-0.16	0.44	-0.25	-0.25	-0.25
SW	-0.66	-0.44	0.2	-0.02	-0.34	-0.26	0.32	0.42	-0.12	-0.57	-0.72	1	0.95	-0.78	0.97	0.92	0.72	0.75	0.7	-0.2	-0.2	-0.2	-0.57	-0.06	-0.06	-0.06
SWLR	-0.48	-0.22	0.37	-0.1	-0.14	-0.16	0.15	0.26	-0.29	-0.36	-0.91	0.95	1	-0.93	0.94	0.98	0.47	0.52	0.53	-0.06	-0.06	-0.06	-0.55	0.07	0.07	0.07
NSL	0.32	0.03	-0.48	0.17	-0.01	0.1	-0.01	-0.12	0.38	0.15	0.96	-0.78	-0.93	1	-0.82	-0.96	-0.18	-0.24	-0.35	-0.08	-0.08	-0.08	0.5	-0.18	-0.18	-0.18
NSW	-0.64	-0.4	0.25	-0.03	-0.31	-0.25	0.31	0.41	-0.15	-0.54	-0.74	0.97	0.94	-0.82	1	0.95	0.7	0.74	0.69	-0.16	-0.16	-0.16	-0.59	-0.01	-0.01	-0.01
NSWLR	-0.49	-0.22	0.38	-0.1	-0.15	-0.17	0.16	0.27	-0.28	-0.35	-0.9	0.92	0.98	-0.96	0.95	1	0.46	0.5	0.53	-0.05	-0.05	-0.05	-0.56	0.08	0.08	0.08
HGW	-0.76	-0.69	-0.16	0.18	-0.6	-0.33	0.57	0.61	0.27	-0.8	-0.07	0.72	0.47	-0.18	0.7	0.46	1	0.99	0.8	-0.42	-0.42	-0.42	-0.41	-0.29	-0.29	-0.29
HSNSW	-0.71	-0.61	-0.09	0.13	-0.5	-0.29	0.51	0.57	0.16	-0.72	-0.14	0.75	0.52	-0.24	0.74	0.5	0.99	1	0.78	-0.34	-0.34	-0.34	-0.43	-0.22	-0.22	-0.22
PW	-0.8	-0.69	-0.09	0.2	-0.53	-0.27	0.65	0.7	0.27	-0.83	-0.24	0.7	0.53	-0.35	0.69	0.53	0.8	0.78	1	-0.25	-0.25	-0.25	-0.55	-0.11	-0.11	-0.11
CHL_AB	0.25	0.34	0.29	-0.52	0.42	-0.03	-0.5	-0.44	-0.54	0.45	-0.16	-0.2	-0.06	-0.08	-0.16	-0.05	-0.42	-0.34	-0.25	1	1	1	-0.29	0.98	0.98	0.98
CHL_AD	0.25	0.34	0.3	-0.53	0.42	-0.04	-0.5	-0.45	-0.54	0.45	-0.16	-0.2	-0.06	-0.08	-0.16	-0.05	-0.42	-0.34	-0.25	1	1	1	-0.29	0.98	0.98	0.98
CHL_AV	0.25	0.34	0.29	-0.52	0.42	-0.04	-0.5	-0.44	-0.54	0.45	-0.16	-0.2	-0.06	-0.08	-0.16	-0.05	-0.42	-0.34	-0.25	1	1	1	-0.29	0.98	0.98	0.98
FLA	0.58	0.35	-0.26	0.35	0.31	0.48	-0.1	-0.17	0.19	0.36	0.44	-0.57	-0.55	0.5	-0.59	-0.56	-0.41	-0.43	-0.55	-0.29	-0.29	-0.29	1	-0.49	-0.49	-0.49
NBI_AB	0.1	0.24	0.33	-0.55	0.32	-0.14	-0.43	-0.37	-0.54	0.33	-0.25	-0.06	0.07	-0.18	-0.01	0.08	-0.29	-0.22	-0.11	0.98	0.98	0.98	-0.49	1	1	1
NBI_AD	0.1	0.24	0.33	-0.56	0.32	-0.14	-0.44	-0.37	-0.54	0.33	-0.25	-0.06	0.07	-0.18	-0.01	0.08	-0.29	-0.22	-0.11	0.98	0.98	0.98	-0.49	1	1	1
NBI_AV	0.1	0.24	0.33	-0.56	0.32	-0.14	-0.44	-0.37	-0.54	0.33	-0.25	-0.06	0.07	-0.18	-0.01	0.08	-0.29	-0.22	-0.11	0.98	0.98	0.98	-0.49	1	1	1
P-value	DF	DM	DFM	FLL	FLW	LA	PH	PNH	PL	TPM	SL	SW	SWLR	NSL	NSW	NSWLR	HGW	NHGW	PW	CHL_AB	CHL_AD	CHL_AV	FLA	NBI_AB	NBI_AD	NBI_AV
DF		0	0.4065	0.9424	0	0.0006	0.0014	0.0012	0.045	0	0.3908	0.0002	0.0121	0.1165	0.0004	0.0114	0	0	0	0.2123	0.2171	0.2146	0.0018	0.6136	0.619	0.6163
DM	0		0.0011	0.4981	0	0.0066	0.0003	0.0009	0.0011	0	0.6154	0.0237	0.2745	0.8781	0.0414	0.287	0	0.0008	0	0.0884	0.0887	0.0885	0.0812	0.2452	0.2444	0.2448
DFM	0.4065	0.0011		0.1047	0.1105	0.9241	0.0603	0.1731	0.001	0.2727	0.0055	0.3194	0.0657	0.0126	0.2191	0.0523	0.4256	0.6511	0.6656	0.1473	0.1415	0.1443	0.1917	0.1023	0.0984	0.1003
FLL	0.9424	0.4981	0.1047		0.7642	0.0005	0.0032	0.0115	0.0005	0.1808	0.3148	0.9201	0.6358	0.4146	0.8701	0.6353	0.3875	0.5274	0.3274	0.0065	0.0058	0.0062	0.0801	0.0033	0.003	0.0031
FLW	0	0	0.1105	0.7642		0	0.0018	0.0049	0.0019	0	0.4656	0.0924	0.4992	0.9751	0.1283	0.4643	0.0011	0.0086	0.0053	0.0307	0.0322	0.0315	0.1228	0.111	0.1144	0.1127
LA	0.0006	0.0066	0.9241	0.0005	0		0.7566	0.7223	0.9536	0.0463	0.9286	0.1964	0.4257	0.6218	0.2237	0.4007	0.0965	0.1514	0.1904	0.866	0.8399	0.8529	0.0136	0.5003	0.4828	0.4915
PH	0.0014	0.0003	0.0603	0.0032	0.0018	0.7566		0	0	0	0.5802	0.1083	0.4706	0.9725	0.1234	0.4347	0.0023	0.0073	0.0003	0.0099	0.0094	0.0096	0.629	0.0269	0.0258	0.0263
PNH	0.0012	0.0009	0.1731	0.0115	0.0049	0.7223	0		0.0005	0.0001	0.9971	0.0321	0.1994	0.5758	0.0354	0.1807	0.001	0.0024	0	0.0236	0.0224	0.023	0.3964	0.0645	0.062	0.0632
PL	0.045	0.0011	0.001	0.0005	0.0019	0.9536	0	0.0005		0.0067	0.0122	0.5526	0.148	0.0582	0.4644	0.1681	0.1822	0.431	0.1782	0.0044	0.0043	0.0044	0.3474	0.0046	0.0045	0.0045
TPM	0	0	0.2727	0.1808	0	0.0463	0	0.0001	0.0067		0.9557	0.0021	0.0734	0.4611	0.0044	0.0768	0	0	0	0.0207	0.0209	0.0208	0.0725	0.0954	0.0958	0.0956
SL	0.3908	0.6154	0.0055	0.3148	0.4656	0.9286	0.5802	0.9971	0.0122	0.9557		0	0	0	0	0	0.7276	0.4951	0.2428	0.4227	0.4212	0.4219	0.0236	0.221	0.2211	0.2209
SW	0.0002	0.0237	0.3194	0.9201	0.0924	0.1964	0.1083	0.0321	0.5526	0.0021	0		0	0	0	0	0	0	0	0.3237	0.3242	0.3239	0.0023	0.7781	0.776	0.777
SWLR	0.0121	0.2745	0.0657	0.6358	0.4992	0.4257	0.4706	0.1994	0.148	0.0734	0	0		0	0	0	0.0156	0.0068	0.0051	0.7777	0.7791	0.7784	0.0037	0.7401	0.7414	0.7407
NSL	0.1165	0.8781	0.0126	0.4146	0.9751	0.6218	0.9725	0.5758	0.0582	0.4611	0	0	0		0	0	0.3669	0.2443	0.0759	0.707	0.7013	0.7041	0.0086	0.3712	0.3688	0.3699
NSW	0.0004	0.0414	0.2191	0.8701	0.1283	0.2237	0.1234	0.0354	0.4644	0.0044	0	0	0	0		0	0	0	0	0.4405	0.4431	0.4417	0.0016	0.9449	0.9452	0.9451
NSWLR	0.0114	0.287	0.0523	0.6353	0.4643	0.4007	0.4347	0.1807	0.1681	0.0768	0	0	0	0	0		0.019	0.0086	0.0049	0.7946	0.7993	0.7969	0.0029	0.7141	0.7123	0.7132
HGW	0	0	0.4256	0.3875	0.0011	0.0965	0.0023	0.001	0.1822	0	0.7276	0	0.0156	0.3669	0	0.019		0	0	0.0348	0.0349	0.0348	0.04	0.1499	0.1492	0.1495
HSNSW	0	0.0008	0.6511	0.5274	0.0086	0.1514	0.0073	0.0024	0.431	0	0.4951	0	0.0068	0.2443	0	0.0086	0		0	0.0886	0.0885	0.0885	0.03	0.2857	0.284	0.2848
PW	0	0	0.6656	0.3274	0.0053	0.1904	0.0003	0	0.1782	0	0.2428	0	0.0051	0.0759	0	0.0049	0	0		0.2115	0.2096	0.2105	0.0035	0.5922	0.5871	0.5896
CHL_AB	0.2123	0.0884	0.1473	0.0065	0.0307	0.866	0.0099	0.0236	0.0044	0.0207	0.4227	0.3237	0.7777	0.707	0.4405	0.7946	0.0348	0.0886	0.2115		0	0	0.1538	0	0	0
CHL_AD	0.2171	0.0887	0.1415	0.0058	0.0322	0.8399	0.0094	0.0224	0.0043	0.0209	0.4212	0.3242	0.7791	0.7013	0.4431	0.7993	0.0349	0.0885	0.2096	0		0	0.1479	0	0	0
CHL_AV	0.2146	0.0885	0.1443	0.0062	0.0315	0.8529	0.0096	0.023	0.0044	0.0208	0.4219	0.3239	0.7784	0.7041	0.4417	0.7969	0.0348	0.0885	0.2105	0	0		0.1508	0	0	0
FLA	0.0018	0.0812	0.1917	0.0801	0.1228	0.0136	0.629	0.3964	0.3474	0.0725	0.0236	0.0023	0.0037	0.0086	0.0016	0.0029	0.04	0.03	0.0035	0.1538	0.1479	0.1508		0.0118	0.0113	0.0115
NBI_AB	0.6136	0.2452	0.1023	0.0033	0.111	0.5003	0.0269	0.0645	0.0046	0.0954	0.221	0.7781	0.7401	0.3712	0.9449	0.7141	0.1499	0.2857	0.5922	0	0	0	0.0118		0	0
NBI_AD	0.619	0.2444	0.0984	0.003	0.1144	0.4828	0.0258	0.062	0.0045	0.0958	0.2211	0.776	0.7414	0.3688	0.9452	0.7123	0.1492	0.284	0.5871	0	0	0	0.0113	0		0
NBI_AV	0.6163	0.2448	0.1003	0.0031	0.1127	0.4915	0.0263	0.0632	0.0045	0.0956	0.2209	0.777	0.7407	0.3699	0.9451	0.7132	0.1495	0.2848	0.5896	0	0	0	0.0115	0		0

## Sheet: 4 - PF_PEARSON CORRELATION
Correlations among traits recorded in PF
Correlation value	DF	DM	DFM	FLL	FLW	LA	PH	PNH	PL	TPM	SL	SW	SWLR	NSL	NSW	NSWLR	HGW	NHGW	PW	CHL_AB	CHL_AD	CHL_AV	FLA	NBI_AB	NBI_AD	NBI_AV
DF	1	0.67	-0.31	0.72	0.69	0.83	0	-0.11	0.39	0.25	0.4	-0.61	-0.55	0.44	-0.6	-0.55	-0.49	-0.52	-0.02	-0.42	-0.43	-0.42	0.78	-0.62	-0.63	-0.62
DM	0.67	1	0.5	0.42	0.59	0.57	-0.28	-0.28	-0.14	0.1	-0.1	-0.18	-0.07	-0.06	-0.16	-0.06	-0.28	-0.3	0.2	-0.11	-0.11	-0.11	0.6	-0.32	-0.32	-0.32
DFM	-0.31	0.5	1	-0.3	-0.05	-0.23	-0.35	-0.24	-0.63	-0.16	-0.59	0.48	0.56	-0.59	0.5	0.57	0.22	0.22	0.28	0.36	0.35	0.36	-0.15	0.32	0.32	0.32
FLL	0.72	0.42	-0.3	1	0.45	0.89	0.46	0.37	0.65	0.02	0.24	-0.26	-0.27	0.26	-0.26	-0.27	-0.15	-0.17	0.23	-0.7	-0.7	-0.7	0.72	-0.81	-0.81	-0.81
FLW	0.69	0.59	-0.05	0.45	1	0.81	-0.28	-0.33	-0.02	-0.13	0.17	-0.32	-0.28	0.21	-0.31	-0.28	-0.25	-0.28	0.33	-0.07	-0.07	-0.07	0.69	-0.33	-0.32	-0.32
LA	0.83	0.57	-0.23	0.89	0.81	1	0.16	0.07	0.42	-0.05	0.26	-0.35	-0.33	0.29	-0.34	-0.34	-0.23	-0.25	0.31	-0.5	-0.5	-0.5	0.83	-0.7	-0.7	-0.7
PH	0	-0.28	-0.35	0.46	-0.28	0.16	1	0.98	0.67	-0.32	0.16	0.2	0.05	0.12	0.17	0.03	0.37	0.38	0.28	-0.6	-0.61	-0.6	0.03	-0.47	-0.47	-0.47
PNH	-0.11	-0.28	-0.24	0.37	-0.33	0.07	0.98	1	0.51	-0.39	0.01	0.36	0.21	-0.03	0.33	0.19	0.47	0.49	0.37	-0.54	-0.54	-0.54	-0.06	-0.39	-0.39	-0.39
PL	0.39	-0.14	-0.63	0.65	-0.02	0.42	0.67	0.51	1	0.07	0.62	-0.48	-0.58	0.61	-0.5	-0.58	-0.17	-0.19	-0.16	-0.59	-0.6	-0.6	0.35	-0.59	-0.59	-0.59
TPM	0.25	0.1	-0.16	0.02	-0.13	-0.05	-0.32	-0.39	0.07	1	0.16	-0.49	-0.36	0.18	-0.48	-0.34	-0.58	-0.59	-0.74	-0.1	-0.11	-0.1	0.08	-0.11	-0.11	-0.11
SL	0.4	-0.1	-0.59	0.24	0.17	0.26	0.16	0.01	0.62	0.16	1	-0.76	-0.93	1	-0.79	-0.94	-0.15	-0.21	-0.35	-0.19	-0.2	-0.2	0.38	-0.29	-0.3	-0.3
SW	-0.61	-0.18	0.48	-0.26	-0.32	-0.35	0.2	0.36	-0.48	-0.49	-0.76	1	0.95	-0.79	1	0.94	0.75	0.79	0.53	0.06	0.07	0.06	-0.43	0.21	0.22	0.22
SWLR	-0.55	-0.07	0.56	-0.27	-0.28	-0.33	0.05	0.21	-0.58	-0.36	-0.93	0.95	1	-0.94	0.96	1	0.51	0.56	0.46	0.12	0.13	0.13	-0.44	0.27	0.27	0.27
NSL	0.44	-0.06	-0.59	0.26	0.21	0.29	0.12	-0.03	0.61	0.18	1	-0.79	-0.94	1	-0.81	-0.95	-0.19	-0.25	-0.35	-0.19	-0.2	-0.19	0.41	-0.31	-0.31	-0.31
NSW	-0.6	-0.16	0.5	-0.26	-0.31	-0.34	0.17	0.33	-0.5	-0.48	-0.79	1	0.96	-0.81	1	0.95	0.72	0.77	0.53	0.07	0.08	0.08	-0.43	0.22	0.23	0.23
NSWLR	-0.55	-0.06	0.57	-0.27	-0.28	-0.34	0.03	0.19	-0.58	-0.34	-0.94	0.94	1	-0.95	0.95	1	0.48	0.53	0.45	0.13	0.14	0.13	-0.45	0.27	0.28	0.28
HGW	-0.49	-0.28	0.22	-0.15	-0.25	-0.23	0.37	0.47	-0.17	-0.58	-0.15	0.75	0.51	-0.19	0.72	0.48	1	1	0.48	-0.05	-0.04	-0.04	-0.22	0.04	0.05	0.05
HSNSW	-0.52	-0.3	0.22	-0.17	-0.28	-0.25	0.38	0.49	-0.19	-0.59	-0.21	0.79	0.56	-0.25	0.77	0.53	1	1	0.49	-0.04	-0.04	-0.04	-0.26	0.07	0.07	0.07
PW	-0.02	0.2	0.28	0.23	0.33	0.31	0.28	0.37	-0.16	-0.74	-0.35	0.53	0.46	-0.35	0.53	0.45	0.48	0.49	1	0	0	0	0.08	-0.03	-0.03	-0.03
CHL_AB	-0.42	-0.11	0.36	-0.7	-0.07	-0.5	-0.6	-0.54	-0.59	-0.1	-0.19	0.06	0.12	-0.19	0.07	0.13	-0.05	-0.04	0	1	1	1	-0.44	0.93	0.93	0.93
CHL_AD	-0.43	-0.11	0.35	-0.7	-0.07	-0.5	-0.61	-0.54	-0.6	-0.11	-0.2	0.07	0.13	-0.2	0.08	0.14	-0.04	-0.04	0	1	1	1	-0.45	0.93	0.93	0.93
CHL_AV	-0.42	-0.11	0.36	-0.7	-0.07	-0.5	-0.6	-0.54	-0.6	-0.1	-0.2	0.06	0.13	-0.19	0.08	0.13	-0.04	-0.04	0	1	1	1	-0.44	0.93	0.93	0.93
FLA	0.78	0.6	-0.15	0.72	0.69	0.83	0.03	-0.06	0.35	0.08	0.38	-0.43	-0.44	0.41	-0.43	-0.45	-0.22	-0.26	0.08	-0.44	-0.45	-0.44	1	-0.74	-0.74	-0.74
NBI_AB	-0.62	-0.32	0.32	-0.81	-0.33	-0.7	-0.47	-0.39	-0.59	-0.11	-0.29	0.21	0.27	-0.31	0.22	0.27	0.04	0.07	-0.03	0.93	0.93	0.93	-0.74	1	1	1
NBI_AD	-0.63	-0.32	0.32	-0.81	-0.32	-0.7	-0.47	-0.39	-0.59	-0.11	-0.3	0.22	0.27	-0.31	0.23	0.28	0.05	0.07	-0.03	0.93	0.93	0.93	-0.74	1	1	1
NBI_AV	-0.62	-0.32	0.32	-0.81	-0.32	-0.7	-0.47	-0.39	-0.59	-0.11	-0.3	0.22	0.27	-0.31	0.23	0.28	0.05	0.07	-0.03	0.93	0.93	0.93	-0.74	1	1	1
P-value	DF	DM	DFM	FLL	FLW	LA	PH	PNH	PL	TPM	SL	SW	SWLR	NSL	NSW	NSWLR	HGW	NHGW	PW	CHL_AB	CHL_AD	CHL_AV	FLA	NBI_AB	NBI_AD	NBI_AV
DF		0.0002	0.1265	0	0	0	0.9935	0.6056	0.0502	0.2149	0.0445	0.0009	0.0035	0.026	0.0011	0.0038	0.0107	0.0062	0.9413	0.0333	0.0295	0.0313	0	0.0007	0.0006	0.0006
DM	0.0002		0.01	0.0307	0.0014	0.0022	0.1728	0.1614	0.5019	0.6138	0.6352	0.3687	0.7435	0.7711	0.4313	0.7769	0.1665	0.1313	0.3224	0.609	0.5772	0.5928	0.0013	0.1129	0.1079	0.1103
DFM	0.1265	0.01		0.1415	0.8134	0.254	0.0768	0.2386	0.0005	0.4289	0.0014	0.013	0.0029	0.0015	0.0089	0.0025	0.2855	0.2745	0.1692	0.0738	0.0756	0.0746	0.4668	0.1084	0.1112	0.1097
FLL	0	0.0307	0.1415		0.0223	0	0.0168	0.066	0.0004	0.9042	0.2283	0.1955	0.1829	0.2037	0.1939	0.181	0.4555	0.405	0.2631	0	0	0	0	0	0	0
FLW	0	0.0014	0.8134	0.0223		0	0.1593	0.1052	0.9312	0.514	0.4114	0.1101	0.1645	0.3075	0.1202	0.1584	0.2271	0.1729	0.0988	0.7382	0.7371	0.7376	0	0.1045	0.1088	0.1066
LA	0	0.0022	0.254	0	0		0.4347	0.7255	0.0317	0.7975	0.2005	0.0843	0.0975	0.1529	0.0874	0.0943	0.265	0.2096	0.1192	0.0099	0.0094	0.0096	0	0	0	0
PH	0.9935	0.1728	0.0768	0.0168	0.1593	0.4347		0	0.0002	0.1066	0.4488	0.3374	0.826	0.5608	0.4021	0.8826	0.0656	0.055	0.1655	0.0011	0.001	0.0011	0.8845	0.0158	0.0151	0.0154
PNH	0.6056	0.1614	0.2386	0.066	0.1052	0.7255	0		0.0077	0.0463	0.952	0.0731	0.3092	0.9032	0.0953	0.3501	0.015	0.0105	0.0641	0.0043	0.0042	0.0043	0.7703	0.0517	0.0501	0.0509
PL	0.0502	0.5019	0.0005	0.0004	0.9312	0.0317	0.0002	0.0077		0.7387	0.0007	0.0123	0.0021	0.0009	0.0089	0.0019	0.3975	0.3521	0.4342	0.0014	0.0012	0.0013	0.0767	0.0016	0.0015	0.0015
TPM	0.2149	0.6138	0.4289	0.9042	0.514	0.7975	0.1066	0.0463	0.7387		0.4306	0.0109	0.0731	0.3808	0.0132	0.0929	0.0018	0.0015	0	0.6145	0.608	0.6112	0.7024	0.6027	0.6017	0.6021
SL	0.0445	0.6352	0.0014	0.2283	0.4114	0.2005	0.4488	0.952	0.0007	0.4306		0	0	0	0	0	0.4509	0.294	0.0821	0.3502	0.3281	0.3389	0.0589	0.1454	0.1389	0.1421
SW	0.0009	0.3687	0.013	0.1955	0.1101	0.0843	0.3374	0.0731	0.0123	0.0109	0		0	0	0	0	0	0	0.0059	0.7726	0.7328	0.7524	0.027	0.2953	0.2836	0.2893
SWLR	0.0035	0.7435	0.0029	0.1829	0.1645	0.0975	0.826	0.3092	0.0021	0.0731	0	0		0	0	0	0.008	0.0028	0.017	0.5522	0.5183	0.5349	0.0244	0.1903	0.1815	0.1858
NSL	0.026	0.7711	0.0015	0.2037	0.3075	0.1529	0.5608	0.9032	0.0009	0.3808	0	0	0		0	0	0.3474	0.2148	0.0807	0.3519	0.3289	0.3402	0.0374	0.1271	0.1213	0.1241
NSW	0.0011	0.4313	0.0089	0.1939	0.1202	0.0874	0.4021	0.0953	0.0089	0.0132	0	0	0	0		0	0	0	0.0055	0.7198	0.681	0.7001	0.0273	0.271	0.2599	0.2653
NSWLR	0.0038	0.7769	0.0025	0.181	0.1584	0.0943	0.8826	0.3501	0.0019	0.0929	0	0	0	0	0		0.0142	0.0054	0.0214	0.5307	0.4977	0.5139	0.0222	0.1772	0.169	0.173
HGW	0.0107	0.1665	0.2855	0.4555	0.2271	0.265	0.0656	0.015	0.3975	0.0018	0.4509	0	0.008	0.3474	0	0.0142		0	0.0122	0.8145	0.8412	0.8279	0.2756	0.8284	0.8163	0.8223
HSNSW	0.0062	0.1313	0.2745	0.405	0.1729	0.2096	0.055	0.0105	0.3521	0.0015	0.294	0	0.0028	0.2148	0	0.0054	0		0.0103	0.8315	0.8608	0.8462	0.1909	0.75	0.7373	0.7436
PW	0.9413	0.3224	0.1692	0.2631	0.0988	0.1192	0.1655	0.0641	0.4342	0	0.0821	0.0059	0.017	0.0807	0.0055	0.0214	0.0122	0.0103		0.986	0.9972	0.9916	0.7068	0.8673	0.874	0.8707
CHL_AB	0.0333	0.609	0.0738	0	0.7382	0.0099	0.0011	0.0043	0.0014	0.6145	0.3502	0.7726	0.5522	0.3519	0.7198	0.5307	0.8145	0.8315	0.986		0	0	0.0244	0	0	0
CHL_AD	0.0295	0.5772	0.0756	0	0.7371	0.0094	0.001	0.0042	0.0012	0.608	0.3281	0.7328	0.5183	0.3289	0.681	0.4977	0.8412	0.8608	0.9972	0		0	0.0216	0	0	0
CHL_AV	0.0313	0.5928	0.0746	0	0.7376	0.0096	0.0011	0.0043	0.0013	0.6112	0.3389	0.7524	0.5349	0.3402	0.7001	0.5139	0.8279	0.8462	0.9916	0	0		0.0229	0	0	0
FLA	0	0.0013	0.4668	0	0	0	0.8845	0.7703	0.0767	0.7024	0.0589	0.027	0.0244	0.0374	0.0273	0.0222	0.2756	0.1909	0.7068	0.0244	0.0216	0.0229		0	0	0
NBI_AB	0.0007	0.1129	0.1084	0	0.1045	0	0.0158	0.0517	0.0016	0.6027	0.1454	0.2953	0.1903	0.1271	0.271	0.1772	0.8284	0.75	0.8673	0	0	0	0		0	0
NBI_AD	0.0006	0.1079	0.1112	0	0.1088	0	0.0151	0.0501	0.0015	0.6017	0.1389	0.2836	0.1815	0.1213	0.2599	0.169	0.8163	0.7373	0.874	0	0	0	0	0		0
NBI_AV	0.0006	0.1103	0.1097	0	0.1066	0	0.0154	0.0509	0.0015	0.6021	0.1421	0.2893	0.1858	0.1241	0.2653	0.173	0.8223	0.7436	0.8707	0	0	0	0	0	0
